# Supplementary material for: Architect: a tool for producing high-quality metabolic models through improved enzyme annotation
Source: bioRxiv or medRxiv preprint supplement (doi:10.1101/2021.10.12.464133), 2021-10-13

**KEY** ECs predictable by

- any tool
- $\geq 2$  tools
- $\geq 3$  tools
- $\geq 4$  tools
- all tools

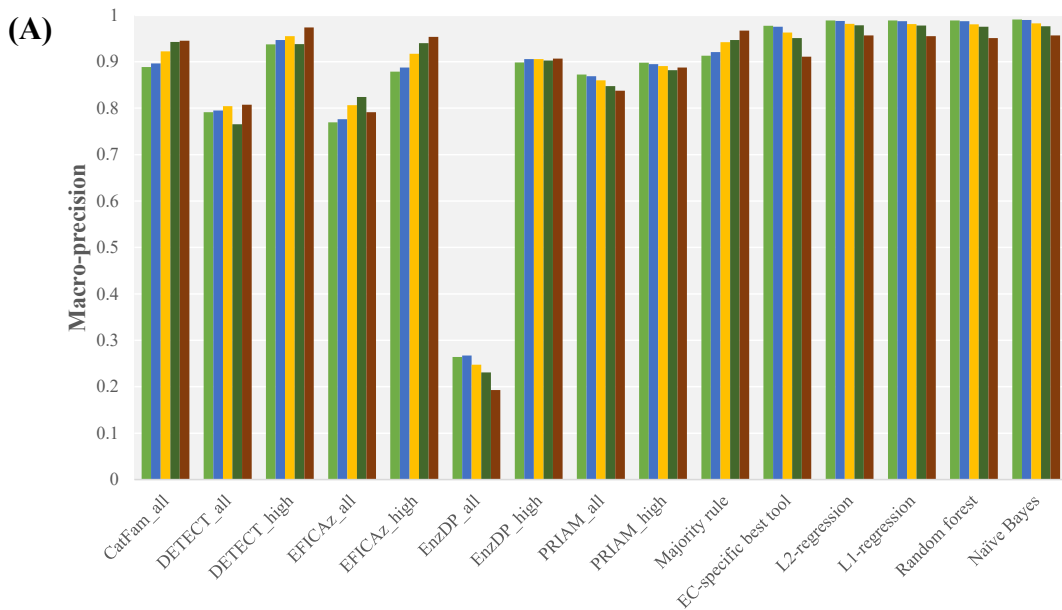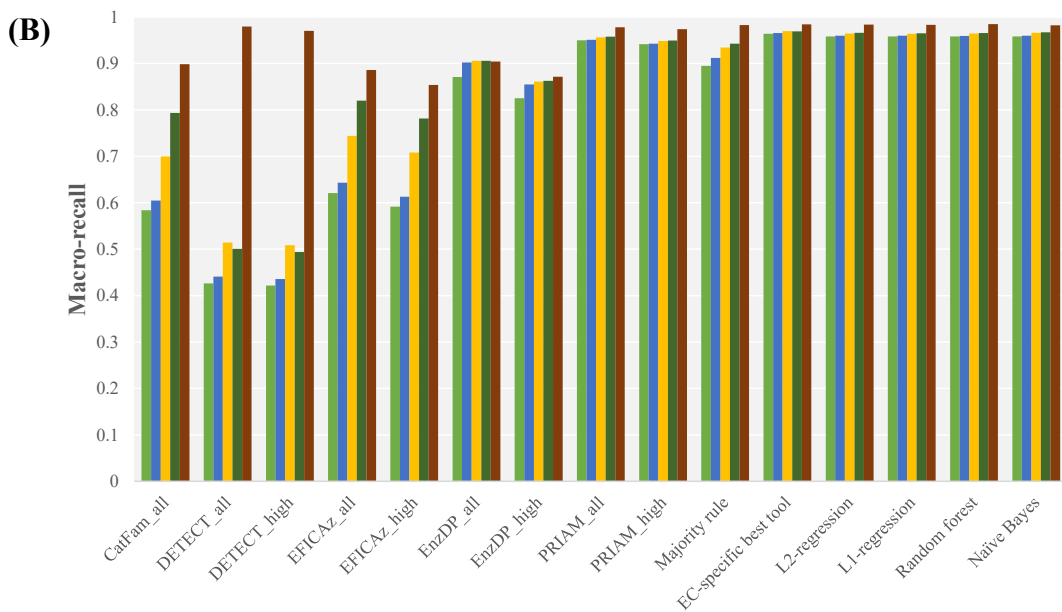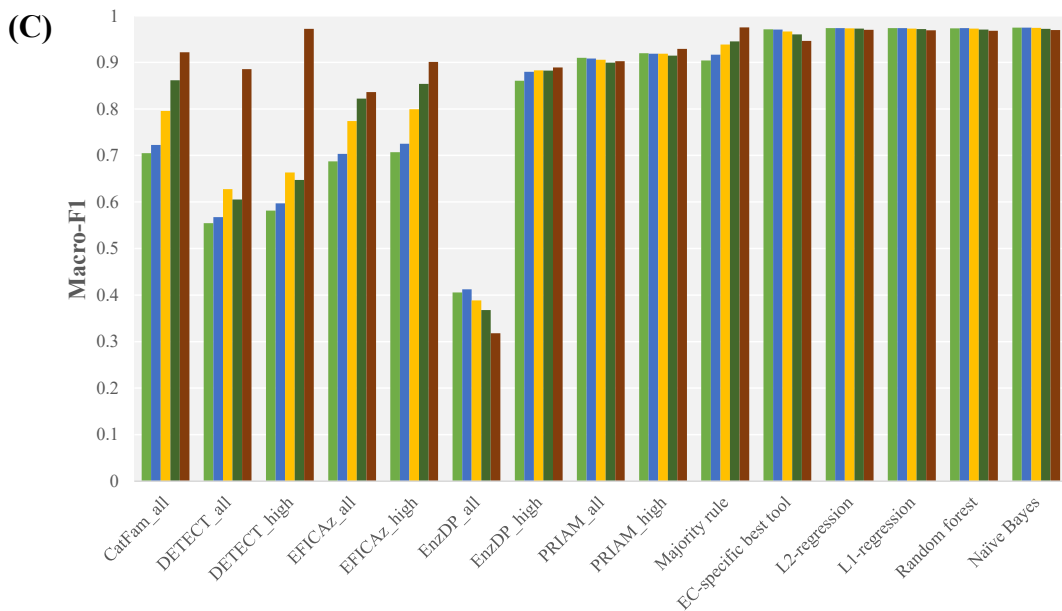

Supplement: Supplementary file [file media-4.pdf]
