# Supplementary material for: Architect: a tool for producing high-quality metabolic models through improved enzyme annotation
Source: bioRxiv or medRxiv preprint supplement (doi:10.1101/2021.10.12.464133), 2021-10-13

**KEY**

- ◆ Individual tool
- ◆ Ensemble method
- ▲ Ensemble method with multi-EC filtering

(i)

(A)

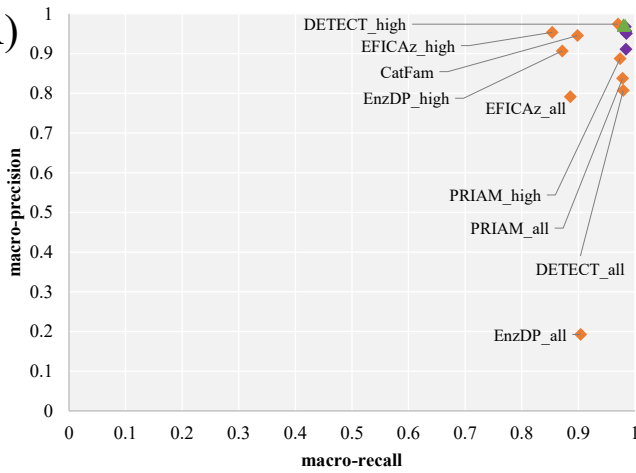

(ii)

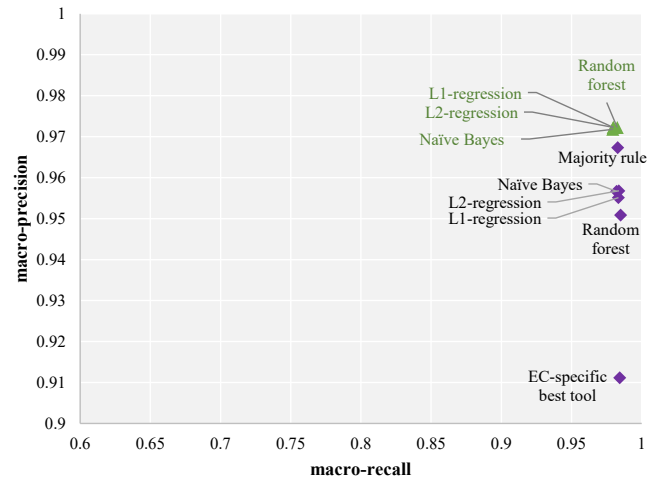

(B)

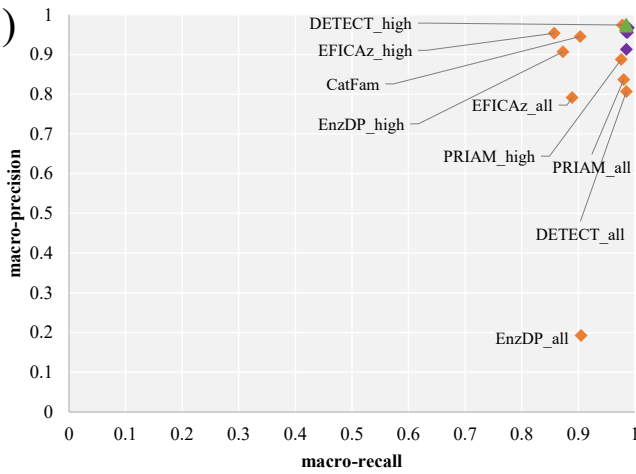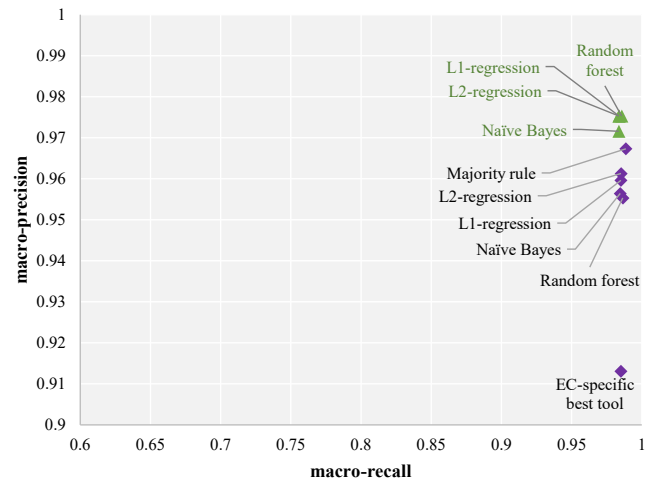

(C)

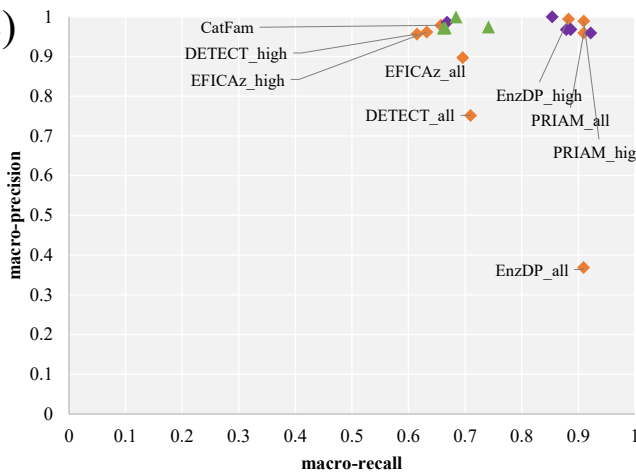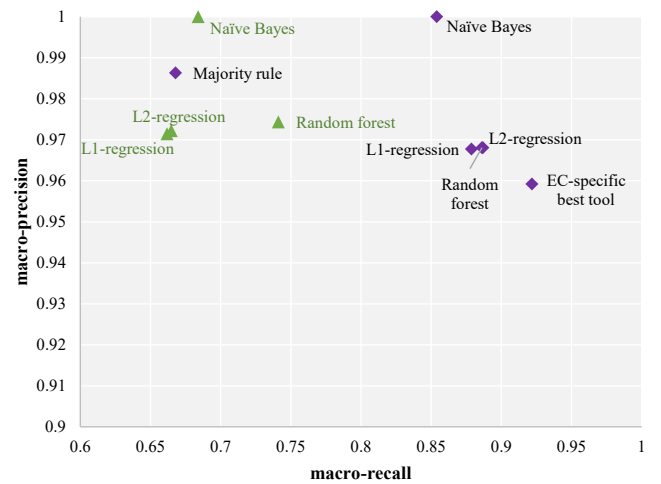

Supplement: Supplementary file [file media-5.pdf]
