# Supplementary material for: Architect: a tool for producing high-quality metabolic models through improved enzyme annotation
Source: bioRxiv or medRxiv preprint supplement (doi:10.1101/2021.10.12.464133), 2021-10-13

**(A)**

|         | Rank | CatFam | DETECT | EFICAZ | EnzDP | PRIAM | F1-score |
|---------|------|--------|--------|--------|-------|-------|----------|
| 2 tools | 1    | █      | █      | █      | █     | █     | 97.2%    |
|         | 2    | █      | █      | █      | █     | █     | 96.8%    |
|         | 3    | █      | █      | █      | █     | █     | 96.8%    |
|         | 4    | █      | █      | █      | █     | █     | 96.6%    |
|         | 5    | █      | █      | █      | █     | █     | 93.5%    |
|         | 6    | █      | █      | █      | █     | █     | 93.4%    |
|         | 7    | █      | █      | █      | █     | █     | 92.7%    |
|         | 8    | █      | █      | █      | █     | █     | 82.3%    |
|         | 9    | █      | █      | █      | █     | █     | 81.5%    |
|         | 10   | █      | █      | █      | █     | █     | 79.5%    |
| 3 tools | 1    | █      | █      | █      | █     | █     | 97.4%    |
|         | 2    | █      | █      | █      | █     | █     | 97.4%    |
|         | 3    | █      | █      | █      | █     | █     | 97.3%    |
|         | 4    | █      | █      | █      | █     | █     | 96.9%    |
|         | 5    | █      | █      | █      | █     | █     | 96.9%    |
|         | 6    | █      | █      | █      | █     | █     | 96.9%    |
|         | 7    | █      | █      | █      | █     | █     | 94.1%    |
|         | 8    | █      | █      | █      | █     | █     | 94.0%    |
|         | 9    | █      | █      | █      | █     | █     | 93.9%    |
|         | 10   | █      | █      | █      | █     | █     | 84.8%    |
| 4 tools | 1    | █      | █      | █      | █     | █     | 97.5%    |
|         | 2    | █      | █      | █      | █     | █     | 97.4%    |
|         | 3    | █      | █      | █      | █     | █     | 97.4%    |
|         | 4    | █      | █      | █      | █     | █     | 97.0%    |
|         | 5    | █      | █      | █      | █     | █     | 94.3%    |

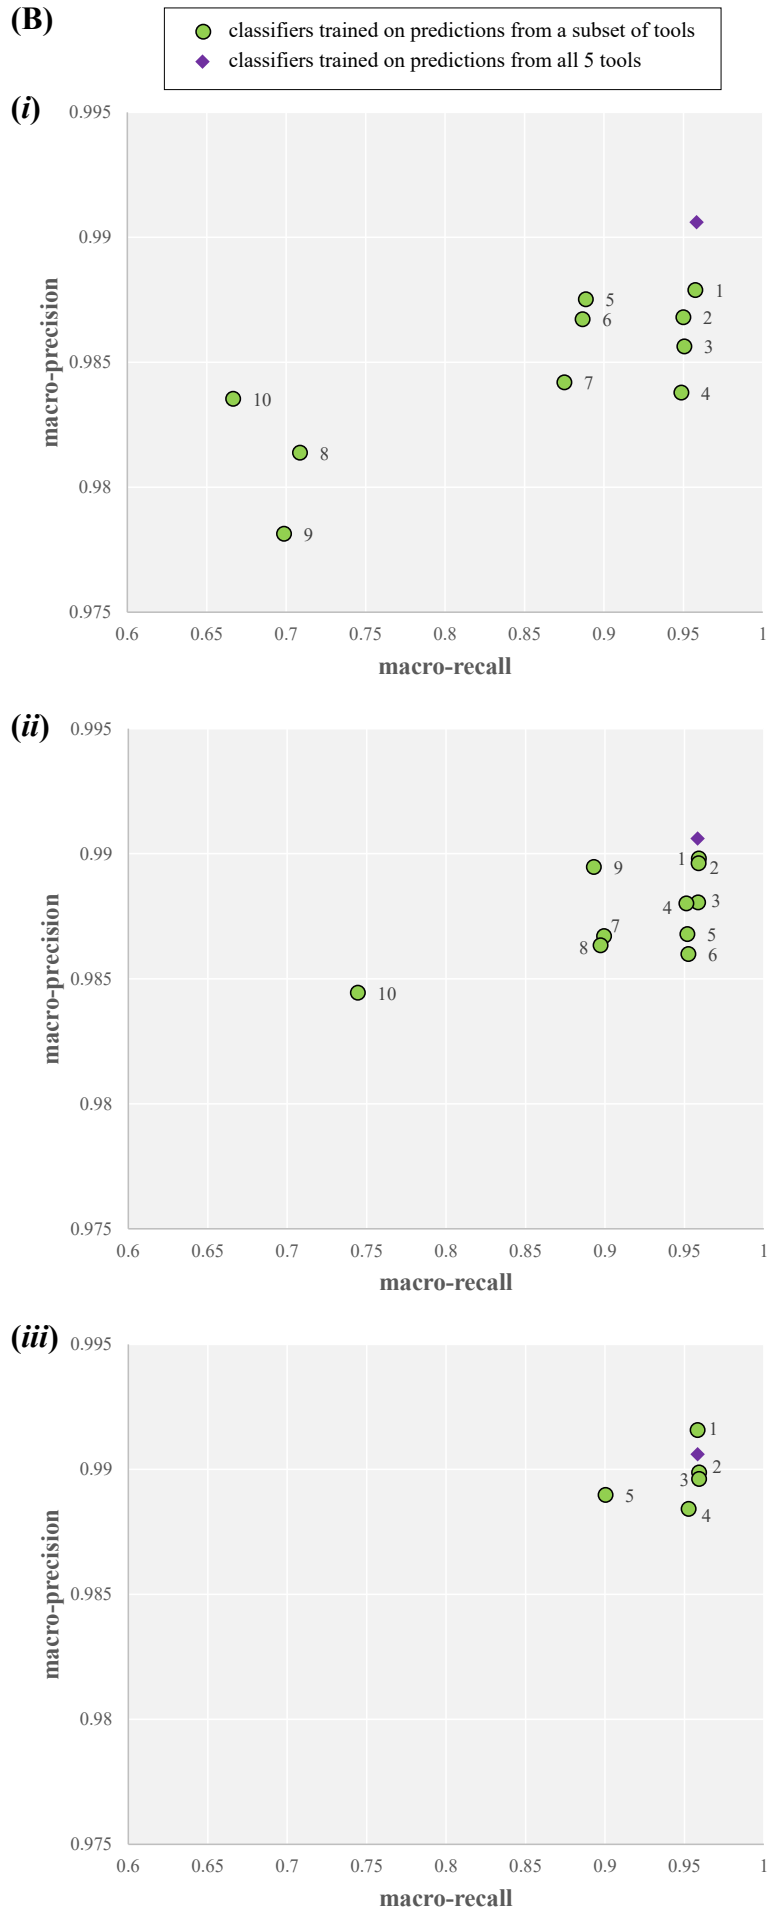

Supplement: Supplementary file [file media-8.pdf]
