# Supplementary material for: Architect: a tool for producing high-quality metabolic models through improved enzyme annotation
Source: bioRxiv or medRxiv preprint supplement (doi:10.1101/2021.10.12.464133), 2021-10-13
Supplement: Supplementary file [file media-10.pdf]

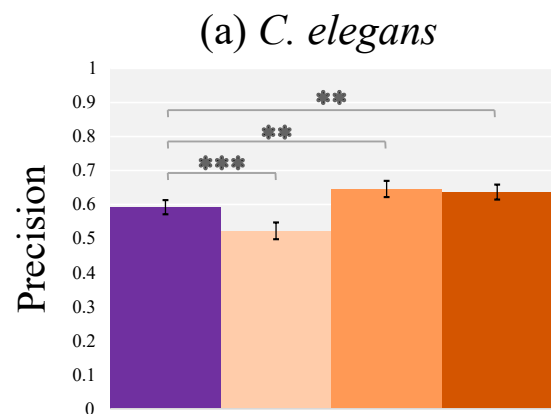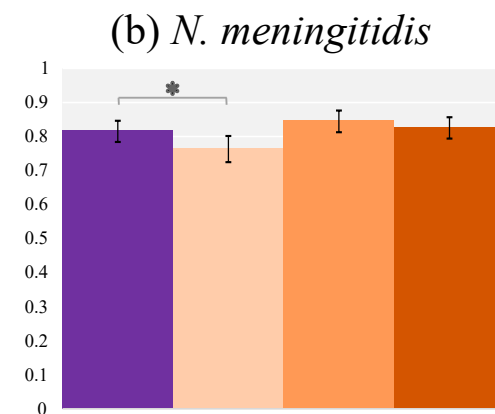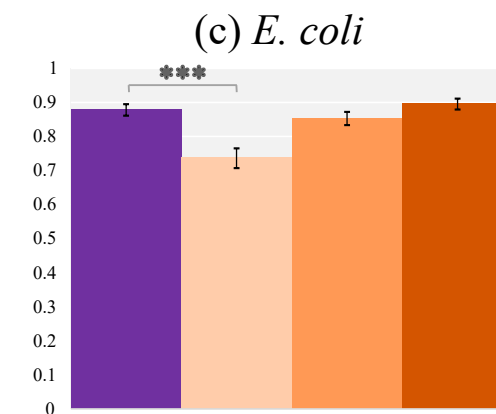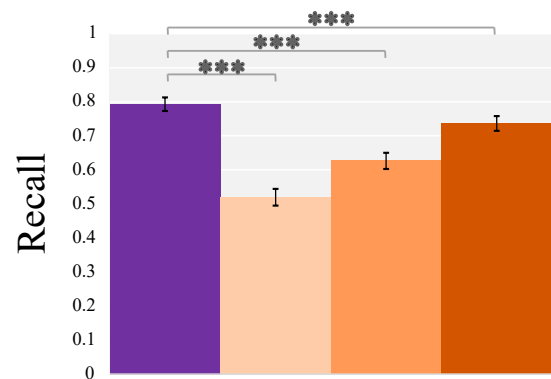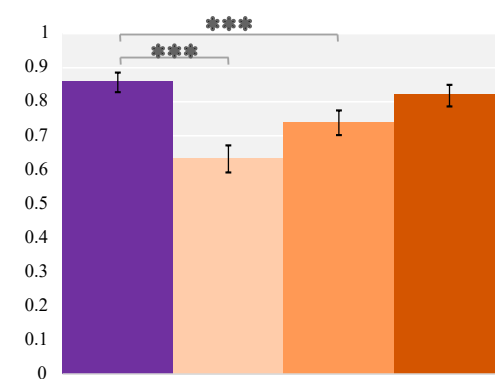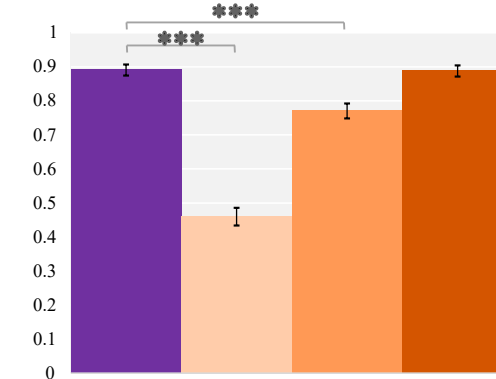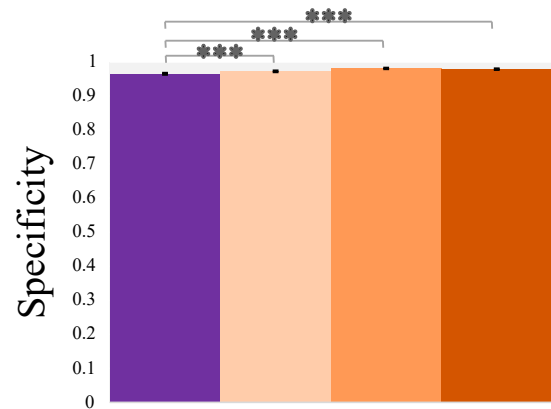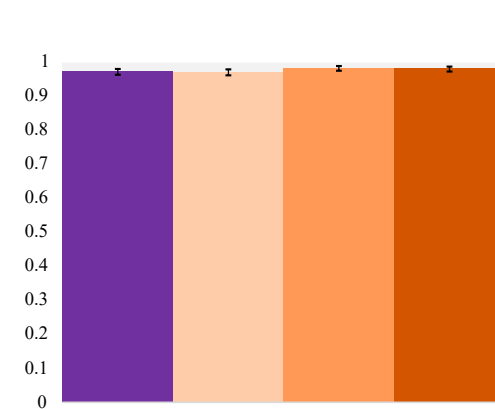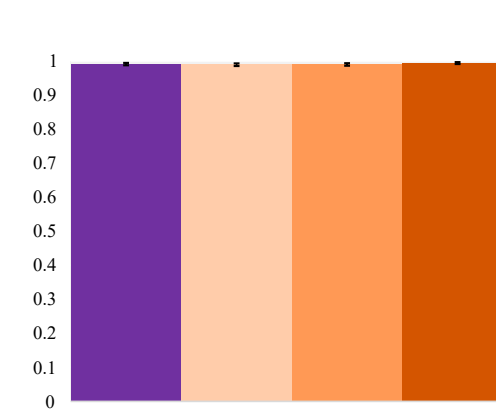

KEY Architect DETECT EnzDP PRIAM
