# Supplementary material for: Architect: a tool for producing high-quality metabolic models through improved enzyme annotation
Source: bioRxiv or medRxiv preprint supplement (doi:10.1101/2021.10.12.464133), 2021-10-13

**(A) *C. elegans***

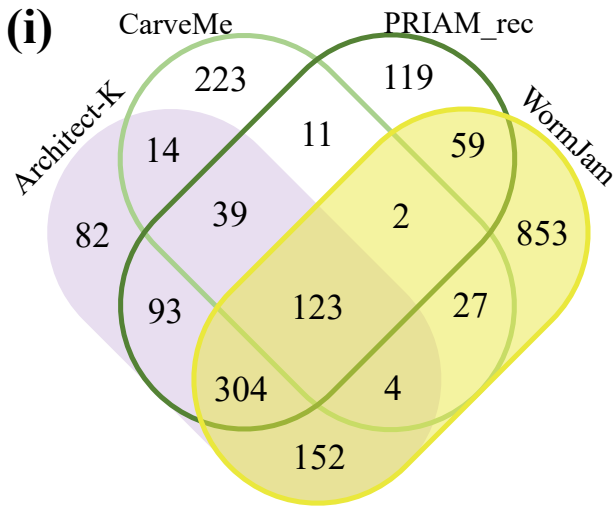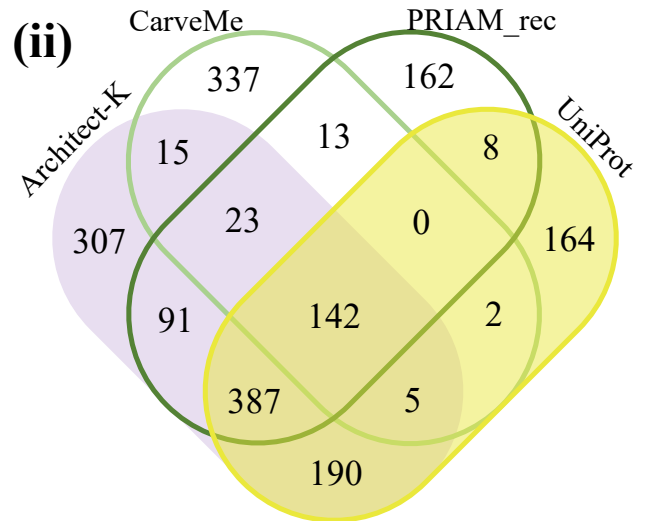

**(B) *N. meningitidis***

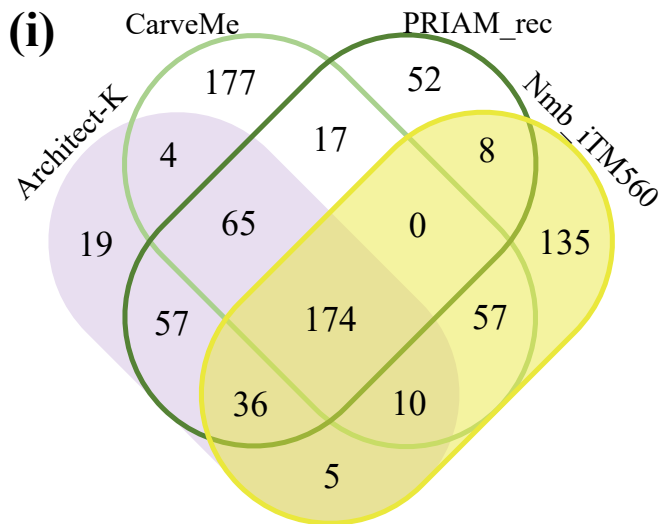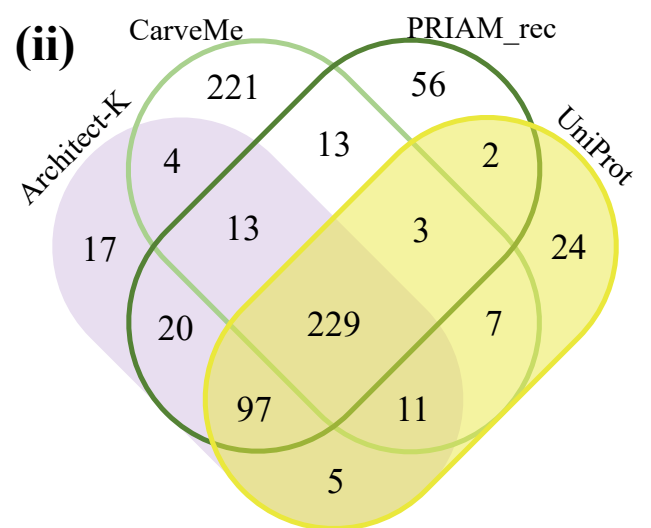

**(C) *E. coli***

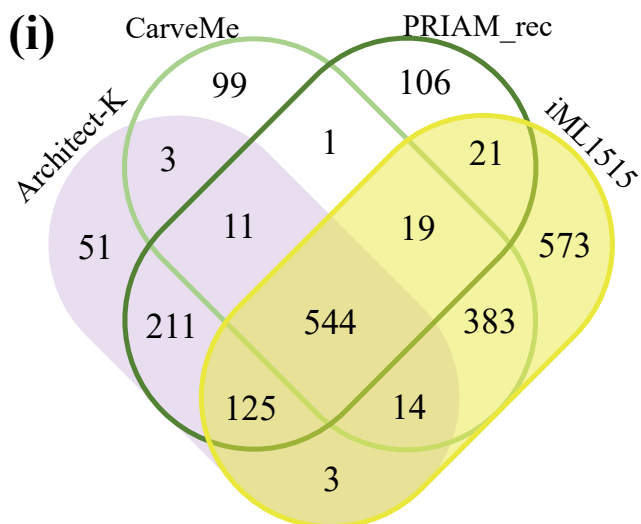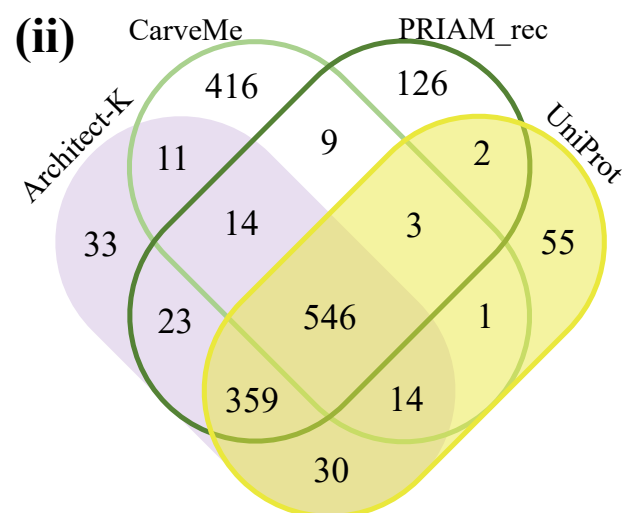

Supplement: Supplementary file [file media-11.pdf]
