# Supplementary material for: Architect: a tool for producing high-quality metabolic models through improved enzyme annotation
Source: bioRxiv or medRxiv preprint supplement (doi:10.1101/2021.10.12.464133), 2021-10-13

(a) *C. elegans*

(b) *N. meningitidis*

(c) *E. coli*

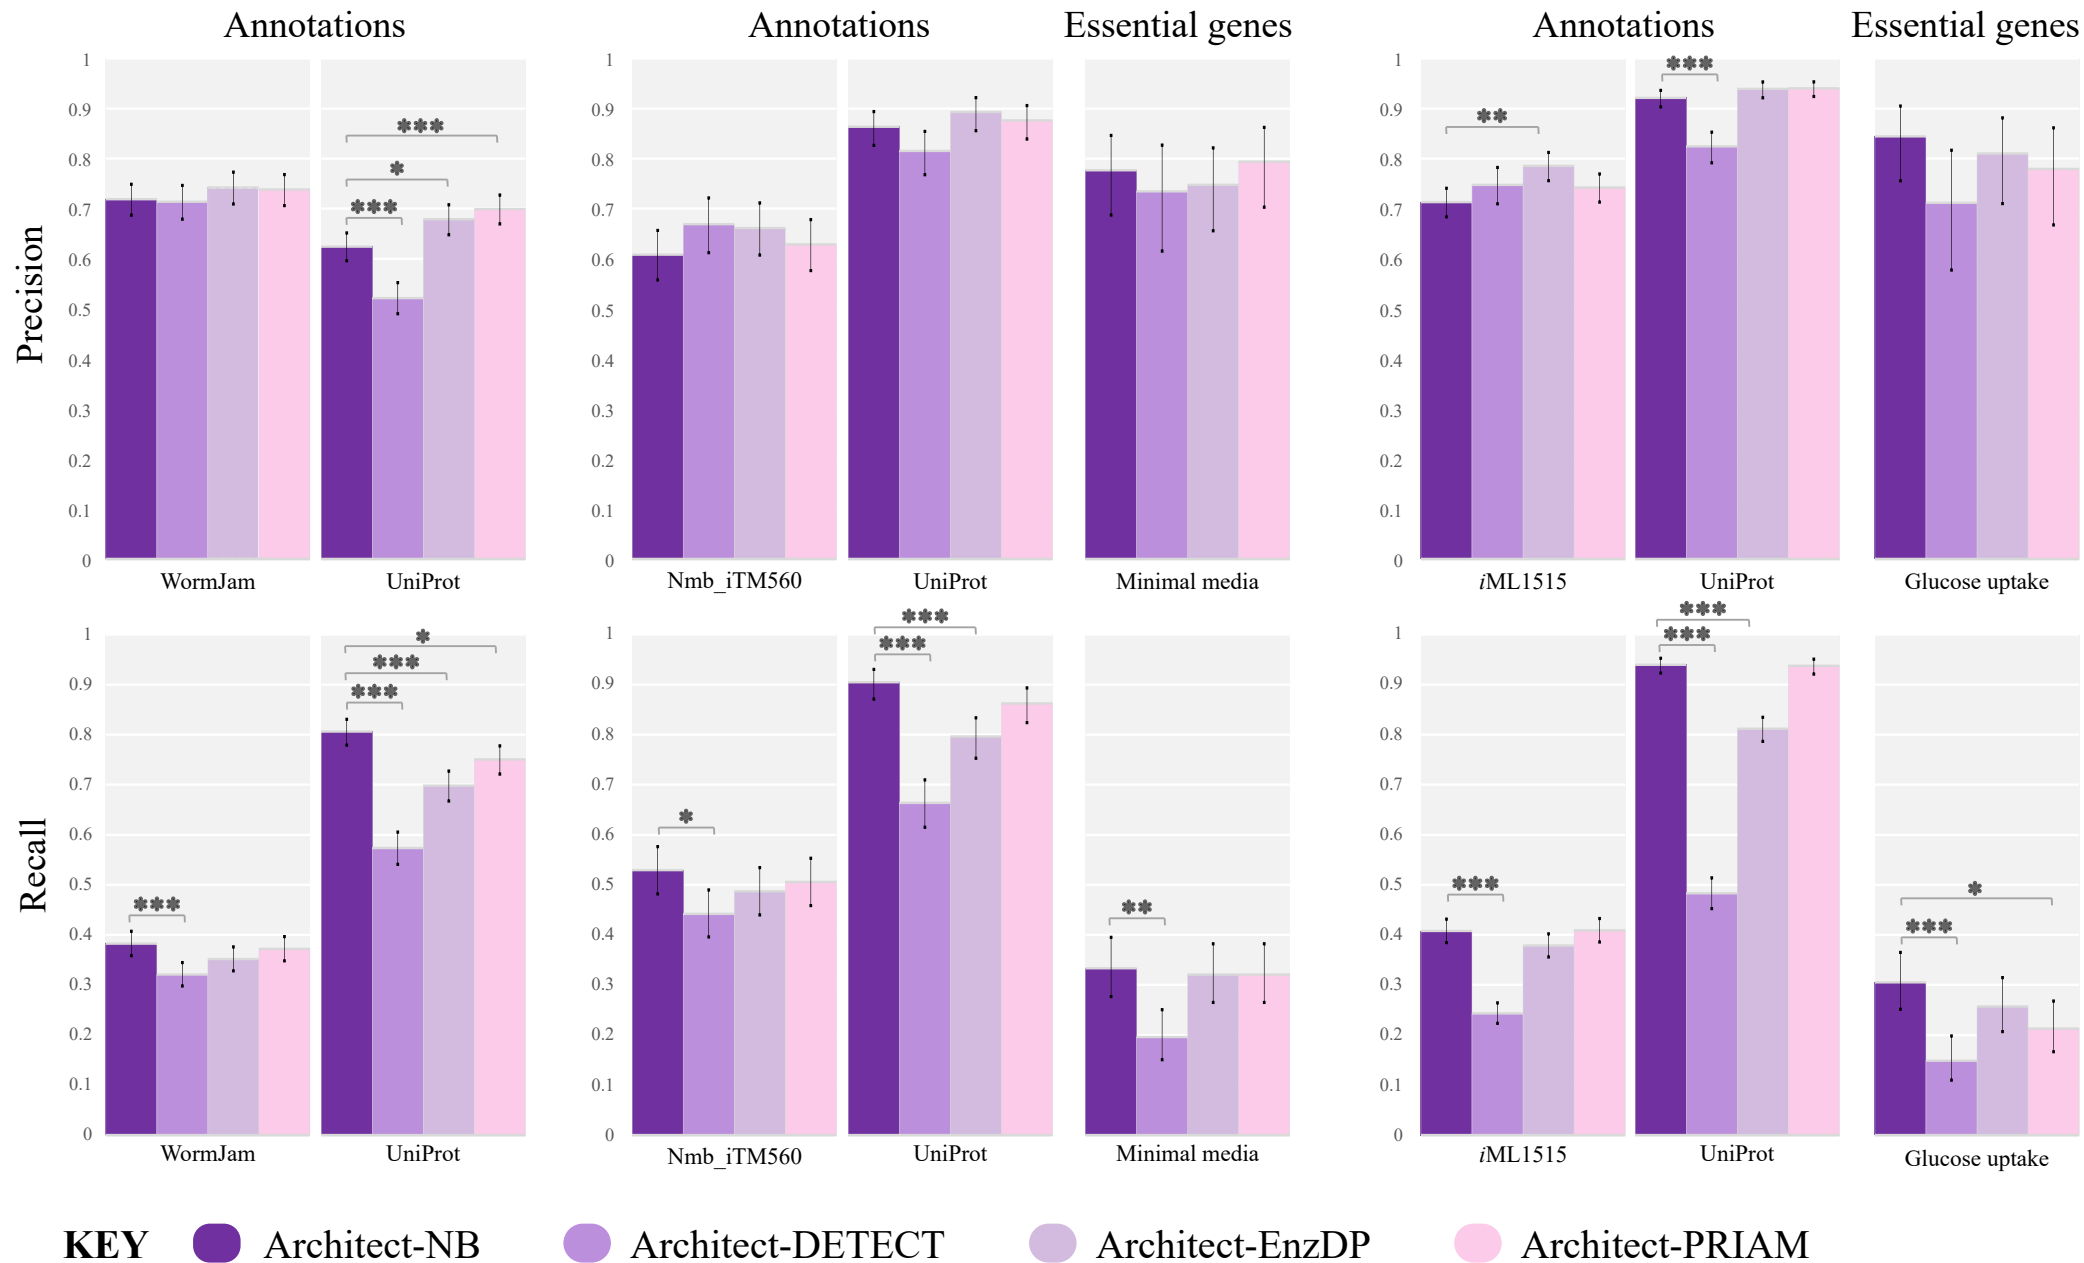

Supplement: Supplementary file [file media-14.pdf]
